# Supplementary material for: A red-emitting Sr3La(1−x)Eux(AlO)3(BO3)4 phosphor with high thermal stability and color purity for near-UV-excited wLEDs
Source: Royal Society of Chemistry journal article supplement (doi:10.1039/c9ra05017e), 2019-01-01
Supplement: c9ra05017e3.pdf [file c9ra05017e3.pdf]

**Supplementary Information**  
**RSC Advances**

A red-emitting  $\text{Sr}_3\text{La}_{(1-x)}\text{Eu}_x(\text{AlO})_3(\text{BO}_3)_4$  phosphor with high thermal stability and color purity for  
near-UV-excited wLEDs

Cheng Yue<sup>a</sup>, Dachuan Zhu<sup>a,\*</sup>, Qun Yan<sup>a</sup> and Yong Pu<sup>b</sup>

<sup>a</sup> *College of Material Science and Engineering, Sichuan University, Chengdu Sichuan, 610065, China*

<sup>b</sup> *Research Institute for New Materials Technology, Chongqing University of Arts and Sciences, Yongchuan Chongqing 402160, China*

\* Corresponding author; Tel: +86 02885460830; fax: +86 02885460830

E-mail: zhudachuan@scu.edu.cn (D. C. Zhu)

Postal address: College of Material Science and Engineering, Sichuan University, Chengdu, Sichuan, P.R. China.

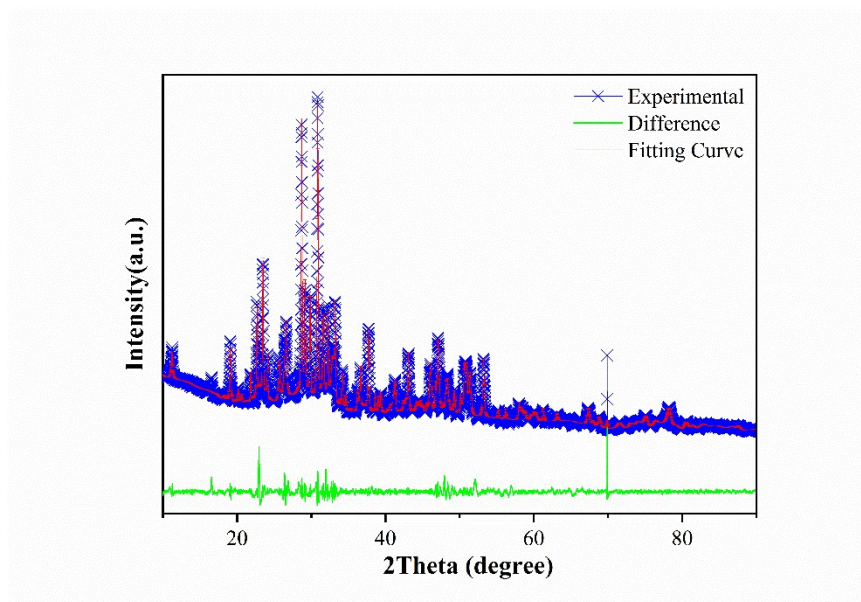

**Figure S1.** Rietveld refinement of  $\text{Sr}_3\text{La}(\text{AlO})_3(\text{BO}_3)_4 \cdot \text{Eu}^{3+}$  phosphor (Rwp = 12.60%, Rp = 9.82%).
